# Supplementary figures and images for: Luminescent metal–organic frameworks with a 2-(4-pyridyl)-terephthalic acid ligand for detection of acetone
Source: Royal Society of Chemistry journal article supplement (doi:10.1039/c9nj00021f), 2019-01-01

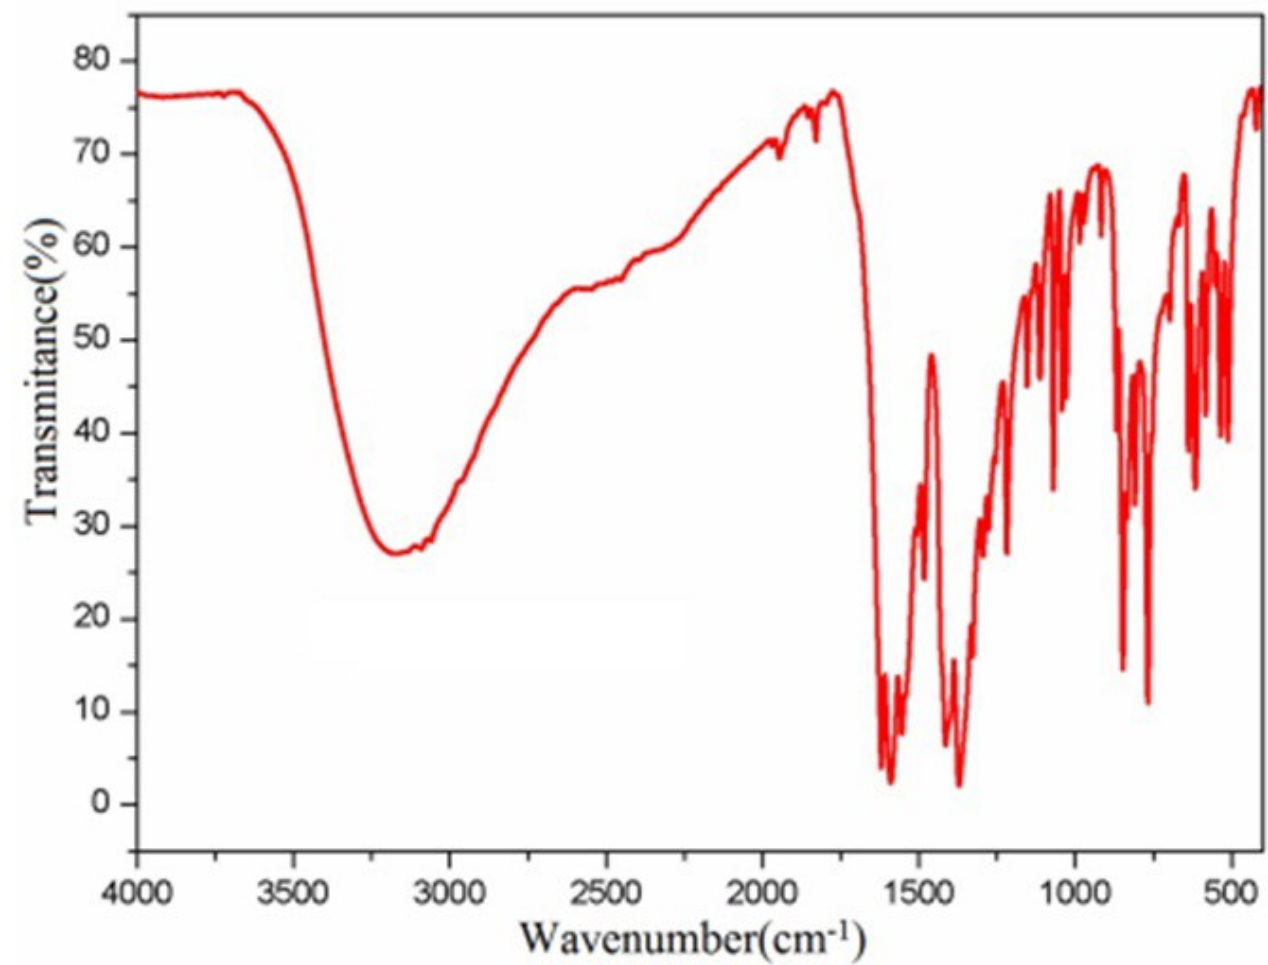

**(a)**

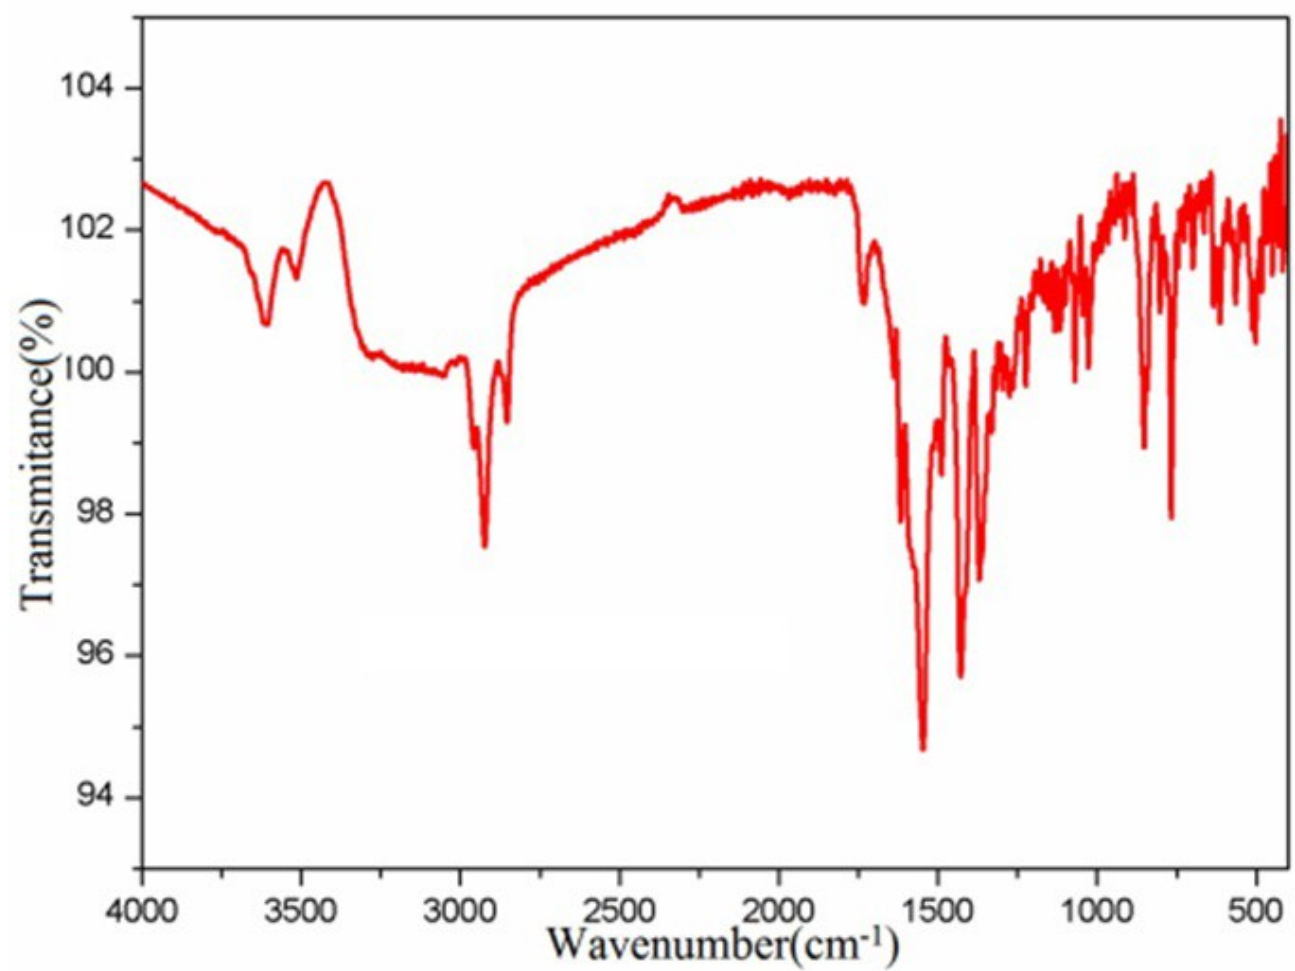

**(b)**

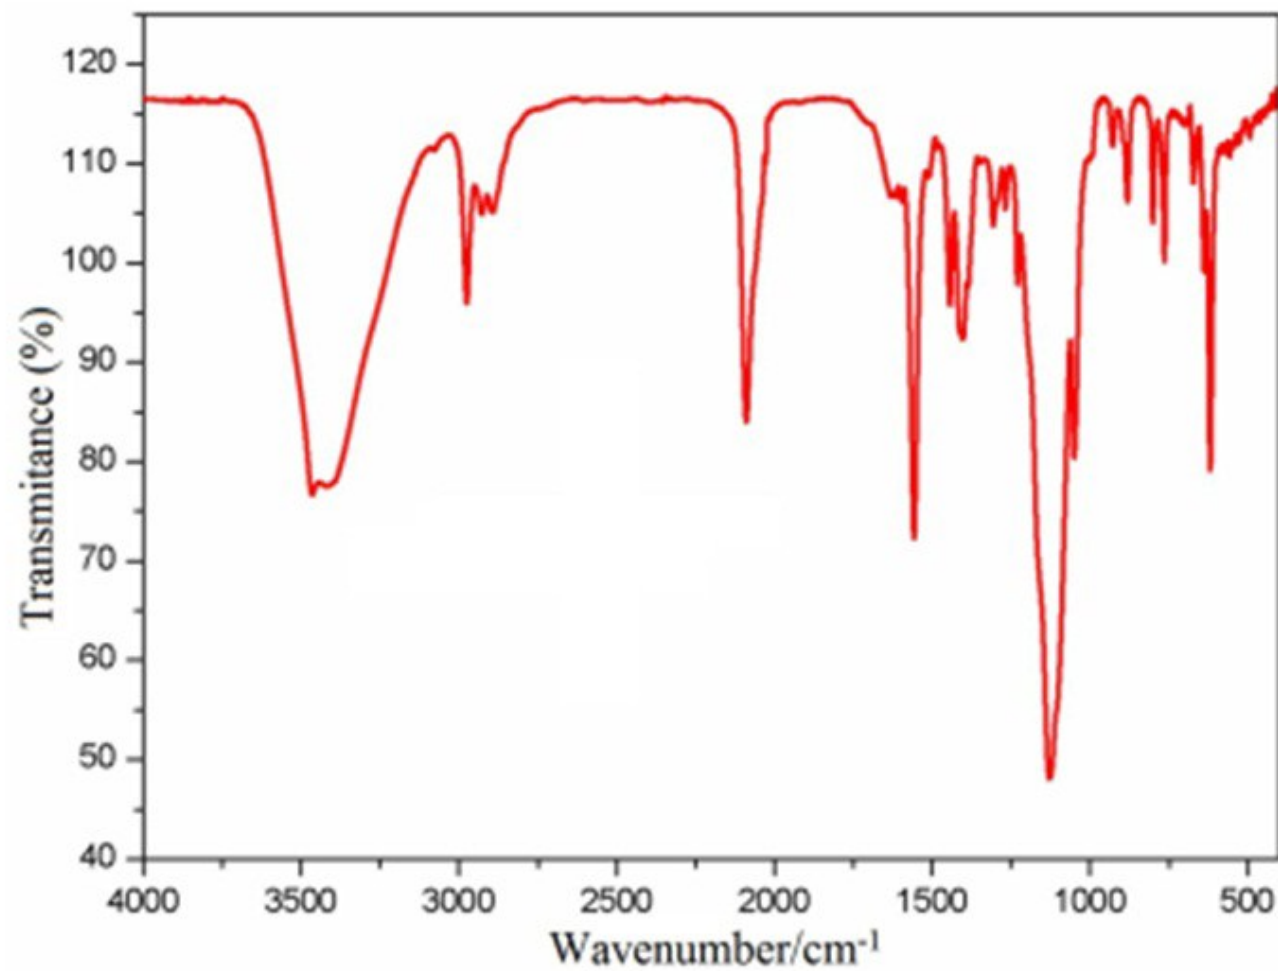

**(c)**

Supplement: c9nj00021f1.pdf [file c9nj00021f1.pdf]

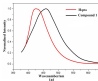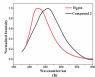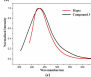

Supplement: c9nj00021f4.pdf [file c9nj00021f4.pdf]
